# Supplementary material for: Hybridization increases genetic diversity in Schistosoma haematobium populations infecting humans in Cameroon
Source: PubMed Central journal article supplement (PMC8962594; doi:10.1186/s40249-022-00958-0), 2022-03-26
Supplement: 40249_2022_958_MOESM1_ESM.pdf [file 40249_2022_958_MOESM1_ESM.pdf]

## Supplementary file S1

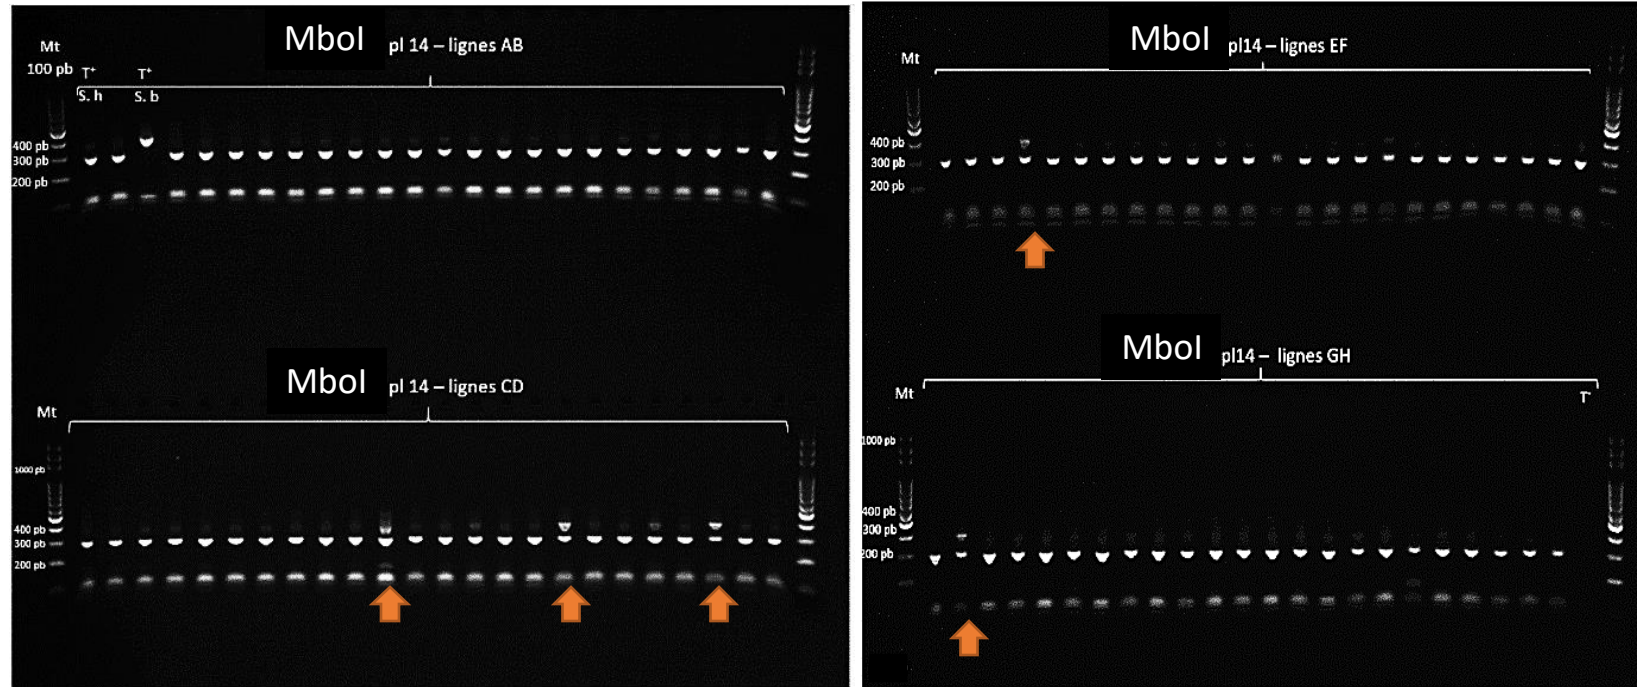

Gel revelation after PCR-RFLP of ITS2 gene. The PCR primers were : Forward: 5'-GGCTGCAGCGTTAACCATTA-3' and reverse: 5'-ACACACACCATCGGTACAAA-3'. The amplified fragments were digested with the Mbol enzyme. After digestion the expected fragments are 44, 82, and 379 bp for *S. haematobium*, and fragments of 44, 82, 98 and 281 bp for *S. bovis*. Only bands higher than 100 bp are visible on the gels.
