# Supplementary material for: Hybridization increases genetic diversity in Schistosoma haematobium populations infecting humans in Cameroon
Source: PubMed Central journal article supplement (PMC8962594; doi:10.1186/s40249-022-00958-0), 2022-03-26
Supplement: 40249_2022_958_MOESM2_ESM.pdf [file 40249_2022_958_MOESM2_ESM.pdf]

Supplementary file S2

| Markers     | Parameters | Populations  |              |              |              |                |              |              |              |              |              |        |
|-------------|------------|--------------|--------------|--------------|--------------|----------------|--------------|--------------|--------------|--------------|--------------|--------|
|             |            | Loum         | MattaBarrage | Bessoum      | Gounougou    | Ouroudoukoudje | Djiporde     | Moutourwa    | Guereme      | Gawaza       | Mokolo       | All    |
| <b>Sh9</b>  | He         | 0,83         | 0,814        | 0,855        | 0,775        | 0,824          | 0,837        | 0,775        | 0,836        | 0,812        | 0,887        | 0,8245 |
|             | Ar         | 8,107        | 8,305        | 9,625        | 9,692        | 8,669          | 8,271        | 8,491        | 7,93         | 9,815        | 8,999        | 9,948  |
|             | Fis        | <b>0,503</b> | <b>0,479</b> | <b>0,393</b> | <b>0,231</b> | <b>0,409</b>   | <b>0,371</b> | <b>0,447</b> | <b>0,527</b> | <b>0,423</b> | <b>0,529</b> | 0,4312 |
| <b>Sh3</b>  | He         | 0,851        | 0,852        | 0,811        | 0,834        | 0,883          | 0,833        | 0,817        | 0,823        | 0,81         | 0,825        | 0,8339 |
|             | Ar         | 12,397       | 12,534       | 10,556       | 12,328       | 11,028         | 11,87        | 10,795       | 9,926        | 11,206       | 11,671       | 12,444 |
|             | Fis        | 0,009        | 0,075        | -0,003       | 0,104        | 0,02           | 0,097        | 0,122        | -0,046       | <b>0,154</b> | 0,214        | 0,0746 |
| <b>C102</b> | He         | 0,526        | 0,44         | 0,534        | 0,517        | 0,572          | 0,553        | 0,484        | 0,535        | 0,605        | 0,444        | 0,521  |
|             | Ar         | 3,178        | 4,292        | 2,999        | 4,004        | 3,305          | 4,011        | 4,181        | 3            | 4,718        | 3            | 3,916  |
|             | Fis        | 0,014        | 0,037        | -0,09        | 0,071        | -0,135         | -0,085       | 0,031        | -0,043       | 0,056        | -0,286       | -0,043 |
| <b>Sh1</b>  | He         | 0,738        | 0,644        | 0,73         | 0,698        | 0,746          | 0,748        | 0,685        | 0,746        | 0,749        | 0,812        | 0,7296 |
|             | Ar         | 6,097        | 8,797        | 6,896        | 8,474        | 7,174          | 7,792        | 6,254        | 4            | 6,316        | 7,436        | 7,625  |
|             | Fis        | 0            | 0,075        | -0,096       | -0,047       | 0,033          | 0,023        | 0,083        | 0,002        | -0,04        | -0,03        | 0,00   |
| <b>Sh14</b> | He         | 0,349        | 0,727        | 0,5          | 0,568        | 0,43           | 0,559        | 0,394        | 0,536        | 0,294        | 0,316        | 0,4673 |
|             | Ar         | 4,59         | 10,892       | 7,935        | 9,514        | 8,871          | 10,13        | 6,923        | 7,79         | 7,084        | 5,401        | 9,133  |
|             | Fis        | 0,05         | 0,083        | 0,018        | -0,089       | 0,083          | -0,056       | 0,027        | 0,045        | -0,026       | -0,131       | 0,00   |
| <b>Sh6</b>  | He         | 0,525        | 0,267        | 0,397        | 0,335        | 0,358          | 0,383        | 0,443        | 0,44         | 0,238        | 0,367        | 0,3753 |
|             | Ar         | 4,77         | 3,985        | 6,568        | 5,032        | 4,781          | 6,057        | 6,789        | 4,926        | 5,075        | 4,84         | 6,195  |
|             | Fis        | 0,209        | 0,018        | 0,003        | -0,071       | 0,006          | -0,037       | 0,101        | 0,155        | 0,033        | 0,027        | 0,0444 |
| <b>C111</b> | He         | 0,616        | 0,626        | 0,631        | 0,615        | 0,612          | 0,657        | 0,641        | 0,579        | 0,635        | 0,587        | 0,6199 |
|             | Ar         | 4,668        | 5,208        | 4,243        | 5,23         | 5,611          | 5,444        | 3,93         | 4,93         | 4,722        | 3,92         | 5,143  |
|             | Fis        | 0,016        | 0,048        | -0,079       | 0,006        | 0,144          | -0,064       | -0,021       | -0,125       | -0,092       | <b>0,361</b> | 0,0194 |
| <b>Sh7</b>  | He         | 0,398        | 0,528        | 0,395        | 0,466        | 0,507          | 0,492        | 0,353        | 0,311        | 0,42         | 0,243        | 0,4113 |
|             | Ar         | 2,46         | 4,199        | 3,859        | 4,102        | 4,256          | 4,14         | 3,592        | 2            | 4,397        | 2,927        | 4,363  |
|             | Fis        | 0,184        | 0,219        | 0,23         | 0,174        | 0,177          | 0,021        | 0,133        | 0,598        | <b>0,23</b>  | 0,476        | 0,2442 |

|             |                                          |              |              |              |              |              |              |              |              |              |              |               |
|-------------|------------------------------------------|--------------|--------------|--------------|--------------|--------------|--------------|--------------|--------------|--------------|--------------|---------------|
| <b>Sh13</b> | He                                       | 0,503        | 0,667        | 0,437        | 0,464        | 0,32         | 0,488        | 0,404        | 0,418        | 0,502        | 0,644        | 0,4847        |
|             | Ar                                       | 5,107        | 10,352       | 8,545        | 8,366        | 5,813        | 9,6          | 4,882        | 3,93         | 7,762        | 9,062        | 8,698         |
|             | Fis                                      | -0,081       | 0,03         | -0,131       | 0,02         | -0,001       | -0,01        | 0,028        | -0,001       | -0,052       | -0,045       | -0,024        |
| <b>Sh11</b> | He                                       | 0,059        | 0,302        | 0,163        | 0,172        | 0,105        | 0,246        | 0,063        | 0,093        | 0,189        | 0,197        | 0,1589        |
|             | Ar                                       | 2,657        | 3,806        | 2,962        | 3,529        | 3,165        | 4,62         | 2,305        | 2,952        | 4,044        | 2            | 3,924         |
|             | Fis                                      | 0,208        | 0,029        | 0,007        | 0,1          | 0,111        | 0,223        | -0,024       | -0,028       | 0,048        | <b>0,631</b> | 0,1305        |
| <b>Sh2</b>  | He                                       | 0,806        | 0,866        | 0,865        | 0,862        | 0,852        | 0,857        | 0,825        | 0,845        | 0,882        | 0,822        | 0,8482        |
|             | Ar                                       | 9,81         | 12,22        | 11,982       | 10,422       | 8,659        | 11,177       | 9,303        | 8,926        | 10,333       | 10,8         | 11,242        |
|             | Fis                                      | <b>0,435</b> | <b>0,428</b> | <b>0,4</b>   | <b>0,224</b> | <b>0,403</b> | <b>0,316</b> | <b>0,329</b> | <b>0,505</b> | <b>0,43</b>  | <b>0,459</b> | 0,3929        |
| <b>Sh5</b>  | He                                       | 0,706        | 0,848        | 0,725        | 0,781        | 0,767        | 0,775        | 0,741        | 0,719        | 0,772        | 0,665        | 0,7499        |
|             | Ar                                       | 7,42         | 12,49        | 10,501       | 11,393       | 11,949       | 11,406       | 10,073       | 9,852        | 11,585       | 7,773        | 11,95         |
|             | Fis                                      | 0,165        | 0,146        | 0,064        | 0,008        | <b>0,212</b> | 0,022        | 0,092        | 0,062        | <b>0,3</b>   | <b>0,317</b> | 0,1388        |
| <b>Sh10</b> | He                                       | 0,337        | 0,439        | 0,318        | 0,422        | 0,294        | 0,378        | 0,199        | 0,305        | 0,263        | 0,155        | 0,311         |
|             | Ar                                       | 2,96         | 5,233        | 3,529        | 3,982        | 3,605        | 4,74         | 2            | 3,93         | 3,796        | 2,994        | 4,173         |
|             | Fis                                      | 0,183        | 0,071        | 0,07         | -0,054       | -0,083       | 0,026        | 0,059        | 0,315        | 0,078        | 0,062        | 0,0727        |
| <b>Sh12</b> | He                                       | 0,28         | 0,283        | 0,59         | 0,481        | 0,521        | 0,453        | 0,707        | 0,642        | 0,64         | 0,672        | 0,5269        |
|             | Ar                                       | 3,5          | 6,028        | 5,445        | 5,518        | 5,479        | 7,138        | 6,438        | 5,996        | 5,726        | 7,728        | 6,599         |
|             | Fis                                      | 0,05         | 0,071        | 0,05         | -0,023       | 0,062        | 0,111        | 0,028        | -0,05        | 0,109        | 0,13         | 0,0538        |
| <b>All</b>  | He                                       | 0,5374       | 0,593071429  | 0,56793      | 0,5707143    | 0,5565       | 0,58993      | 0,53792857   | 0,55914      | 0,5579       | 0,5454       | 0,5616        |
|             | Ar                                       | 5,5515       | 7,738642857  | 6,83179      | 7,2561429    | 6,5975       | 7,59971      | 6,13971429   | 5,72057      | 6,8985       | 6,3251       | 7,5252        |
|             | Fis                                      | <b>0,154</b> | <b>0,157</b> | <b>0,082</b> | <b>0,059</b> | <b>0,134</b> | <b>0,083</b> | <b>0,131</b> | <b>0,143</b> | <b>0,153</b> | <b>0,206</b> | <b>0,1302</b> |
|             | Number of alleles carried by the hybrids | 2            | 4            | 2            | 7            | 2            | 3            | 1            | 0            | 1            | 3            |               |

Genetic diversity parameters for each locus calculated for each population. Ar: allelic richness, He: expected heterozygosity and Fis: Fixation index. Fis in bold are significantly deviating from Hardy-Weinberg expectations (*i.e.* significantly different from 0;  $P < 0.0004$  after Bonferroni adjustment).
